# Supplementary material
Source: publisher figshare collection journal article supplement (https://acs.figshare.com/ndownloader/files/20234526)
Supplement: Supplementary file 1 [file 20234526]

## Sheet: Cover_page_S6_Table
Exploring the Potentiality of Natural Products from Essential Oils as Inhibitors of Odorant-binding Proteins: A Structure- and Ligand-based Virtual Screening Approach to Find Novel Mosquito Repellents
Kauê Santana da Costa1,*, João Marcos Galúcio1, Clauber Henrique Souza da Costa2, Amanda Ruslana Santana,2 Vitor dos Santos Carvalho4, Lidiane Diniz do Nascimento3, Anderson Henrique Lima e Lima4, Jorddy Neves Cruz2, Claudio Nahum Alves4, Jerônimo Lameira 5,*
1 Institute of Biodiversity, Federal University of Western Pará, Santarém, Pará, Brazil.
2Department of Pharmaceutical Sciences, Federal University of Pará, 66060-902, Belém, Pará, Brazil.
3 Museu Paraense Emilio Goeldi, Botany Coordination. Adolpho Ducke Laboratory, Belém, Pará Brazil.
4 Institute of Exact and Natural Sciences, Federal University of Pará, 66075-110, Belém, Pará, Brazil.
5Institute of Biological Sciences, Federal University of Pará, 66075-110, Belém, Pará, Brazil.
*Authors for correspondence:
1. Kauê Santana da Costa. Rua Vera Paz, s/n Salé. Santarém Pará Brasil. Zipcode: 68040-255. Phone number: +55 93 2101-6771. E-mail: kaue.costa@ufopa.edu.br.
2. Jerônimo Lameira Silva. Rua Augusto Corrêa 01. Guamá. Belém Pará Brazil Zipcode: 66075-110. E-mail: lameira@ufpa.br.

## Sheet: Repellents
Table S6 – Chemical structure, common name, molecular formula PubChem CID, and physicochemical and structural properties (clogP, molecular weight, H-bond donors, H-bond acceptors, number of aromatic rings and rotatable bonds) of the selected commercial repellents.
CdId	Structure	Mol Weight	Formula	Compound Name	Database	PubChem CID	Smiles	Total Molweight	cLogP	H-Acceptors	H-Donors	Rotatable Bonds	Aromatic Rings
1		215.293	C11H21NO3	Ethyl butylacetylaminopropionate (IR3535)	PubChem	104150	CCCCN(CCC(OCC)=O)C(C)=O	215292	16548	4	0	8	0
2		226.272	C12H18O4	Indalone	PubChem	10760	CCCCOC(C(OC(C)(C)C1)=CC1=O)=O	226271	16706	4	0	5	0
3		210.229	C11H14O4	Dimethyl carbate (DMC)	PubChem	10921747	COC([C@H]([C@@H]1C=C[C@H]2C1)[C@H]2C(OC)=O)=O	210228	5218	4	0	4	0
4		229.32	C12H23NO3	Icaridin	PubChem	125098	CCC(C)OC(N1C(CCO)CCCC1)=O	229319	23297	4	1	5	0
5		191.274	C12H17NO	N,N-Diethylphenylacetamide(DEPA)	PubChem	17076	CCN(CC)C(Cc1ccccc1)=O	191273	21756	2	0	4	1
6		212.248	C14H12O2	Benzyl Benzoate	PubChem	2345	O=C(c1ccccc1)OCc1ccccc1	212247	29907	2	0	4	2
7		106.124	C7H6O	Benzaldehyde	PubChem	240	O=Cc1ccccc1	106124	15929	1	0	1	1
8		204.269	C13H16O2	MGK Repellent 11	PubChem	31341	O=CC12OC(CC=CC3)C3C1CC=CC2	204268	11238	2	0	1	0
9		191.274	C12H17NO	Diethyltoluamide (DEET)	PubChem	4284	CCN(CC)C(c1cc(C)ccc1)=O	191273	25214	2	0	3	1
10		172.268	C10H20O2	p-Menthane-3,8-diol	PubChem	556998	CC(CCC1C(C)(C)O)CC1O	172267	15517	2	2	1	0
11		160.257	C9H20O2	2-Ethyl-2-butyl-1,3-propanediol	PubChem	61038	CCCCC(CC)(CO)CO	160256	21799	2	2	6	0
12		156.225	C9H16O2	Cyclohexanepropanoic Acid	PubChem	69702	OC(CCC1CCCCC1)=O	156224	19538	2	1	3	0
13		146.23	C8H18O2	Ethohexadiol(Rutgers 612)	PubChem	7211	CCCC(C(CC)CO)O	146229	1519	2	2	5	0
14		194.186	C10H10O4	Dimethyl phthalate (DBP)	PubChem	8554	COC(c(cccc1)c1C(OC)=O)=O	194185	14856	4	0	4	1
15		151.165	C8H9NO2	Methyl anthranilate	PubChem	8635	COC(c(cccc1)c1N)=O	151164	8953	3	1	2	1
16		251.282	C13H17NO4	Dipropyl Isocinchomeronate (MGK repellent 326)	PubChem	8693	CCCOC(c(cc1)cnc1C(OCCC)=O)=O	251281	22601	5	0	8	1
17		156.269	C10H20O	Citronellol	PubChem	8842	C[C@@H](CCC=C(C)C)CCO	156268	33494	1	1	5	0
18		207.317	C13H21NO	(1S)-3-Cyclohexen-1-yl[(2S)-2-methyl-1-piperidinyl]methanone (SS220)	PubChem	90567	CC(CCCC1)N1C(C1CC=CCC1)=O	207316	24475	2	0	1	0
